# Supplementary material
Source: publisher figshare collection journal article supplement (https://acs.figshare.com/ndownloader/files/4678513)
Supplement: Supplementary file 1 [file 4678513]

## Supporting Information for the Manuscript:

### Role of Cu<sup>0</sup> in Living Radical Polymerization

Krzysztof Matyjaszewski,\* Nicolay V. Tsarevsky, Wade A. Braunecker, Hongchen Dong, Jinyu

Huang, Wojciech Jakubowski, Yungwan Kwak, Renaud Nicolay, Wei Tang, and Jeong Ae Yoon

*Department of Chemistry, Carnegie Mellon University, 4400 Fifth Avenue, Pittsburgh, Pennsylvania*

*15213*

Email: [km3b@andrew.cmu.edu](mailto:km3b@andrew.cmu.edu)

#### I. Comproportionation and Disproportionation Experiments: Electronic Spectra

##### A. Solvent Effect

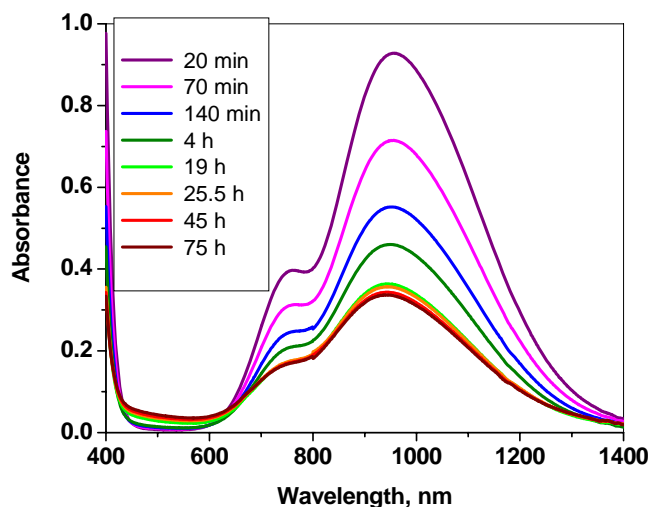

**Figure S1.** Evolution of the electronic spectra of CuBr<sub>2</sub>/Me<sub>6</sub>TREN in the presence of Cu metal in DMSO. Conditions: [CuBr<sub>2</sub>]<sub>0</sub> = 2.5 mM, [Cu<sup>0</sup>]<sub>0</sub> = 2.75 mM, [Me<sub>6</sub>TREN]<sub>0</sub> = 5.25 mM, 25 °C.

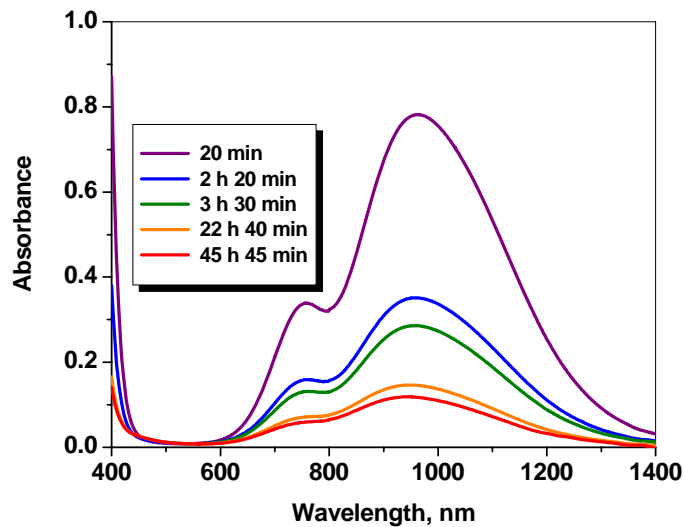

**Figure S2.** Evolution of the electronic spectra of  $\text{CuBr}_2/\text{Me}_6\text{TREN}$  in the presence of Cu metal in DMF. Conditions:  $[\text{CuBr}_2]_0 = 2.5 \text{ mM}$ ,  $[\text{Cu}^0]_0 = 2.75 \text{ mM}$ ,  $[\text{Me}_6\text{TREN}]_0 = 5.25 \text{ mM}$ ,  $25^\circ\text{C}$ .

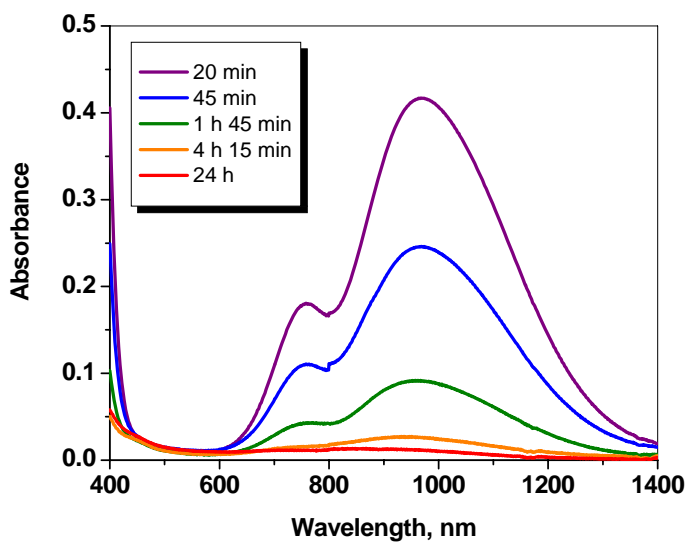

**Figure S3.** Evolution of the electronic spectra of  $\text{CuBr}_2/\text{Me}_6\text{TREN}$  in the presence of Cu metal in MeCN. Conditions:  $[\text{CuBr}_2]_0 = 2.5 \text{ mM}$ ,  $[\text{Cu}^0]_0 = 2.75 \text{ mM}$ ,  $[\text{Me}_6\text{TREN}]_0 = 5.25 \text{ mM}$ ,  $25^\circ\text{C}$ .

## B. Effect of Me<sub>6</sub>TREN Concentration

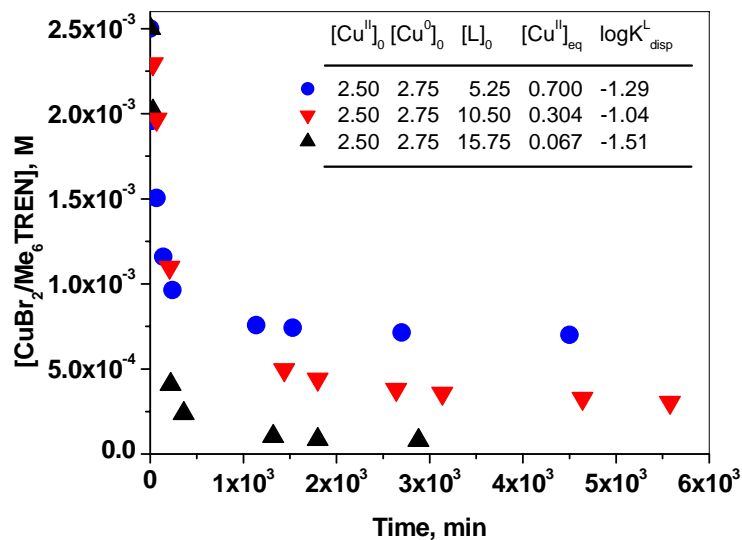

**Figure S4.** Comproportionation of CuBr<sub>2</sub>/Me<sub>6</sub>TREN (initial concentration 2.5 mM) in the presence of Cu<sup>0</sup> (10 % excess) and various amounts of ligand in DMSO at 25 °C. All concentrations in the inserted table are in mM.

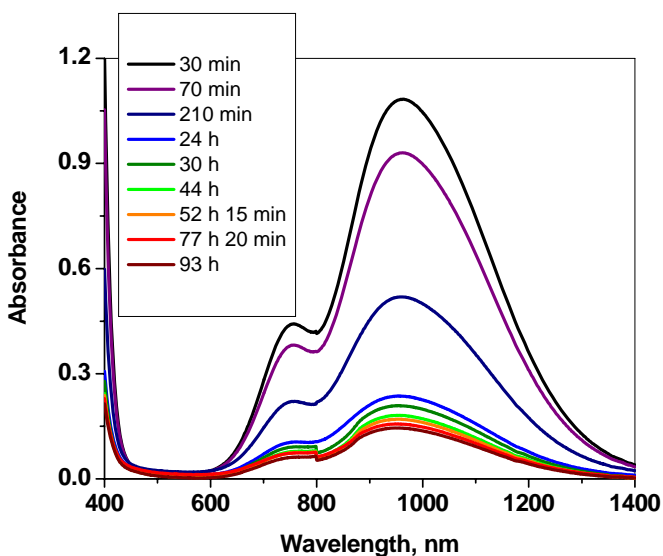

**Figure S5.** Evolution of the electronic spectra of CuBr<sub>2</sub>/Me<sub>6</sub>TREN in the presence of Cu metal in DMSO. Conditions: [CuBr<sub>2</sub>]<sub>0</sub> = 2.5 mM, [Cu<sup>0</sup>]<sub>0</sub> = 2.75 mM, [Me<sub>6</sub>TREN]<sub>0</sub> = 10.5 mM, 25 °C.

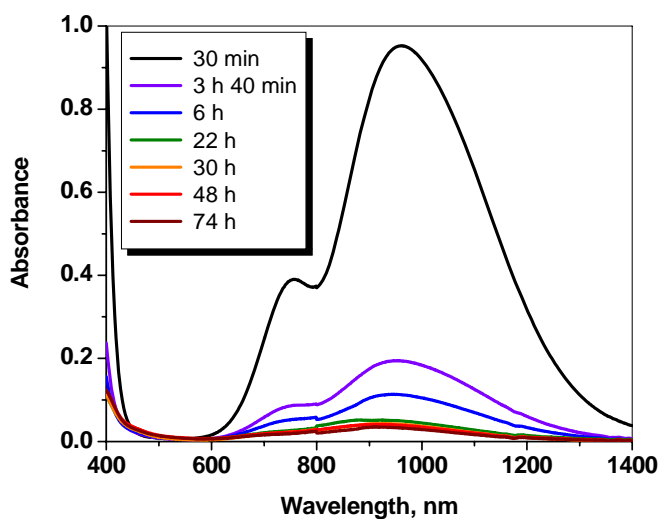

**Figure S6.** Evolution of the electronic spectra of  $\text{CuBr}_2/\text{Me}_6\text{TREN}$  in the presence of Cu metal in DMSO. Conditions:  $[\text{CuBr}_2]_0 = 2.5 \text{ mM}$ ,  $[\text{Cu}^0]_0 = 2.75 \text{ mM}$ ,  $[\text{Me}_6\text{TREN}]_0 = 15.75 \text{ mM}$ ,  $25^\circ\text{C}$ .

### C. Counterion Effect

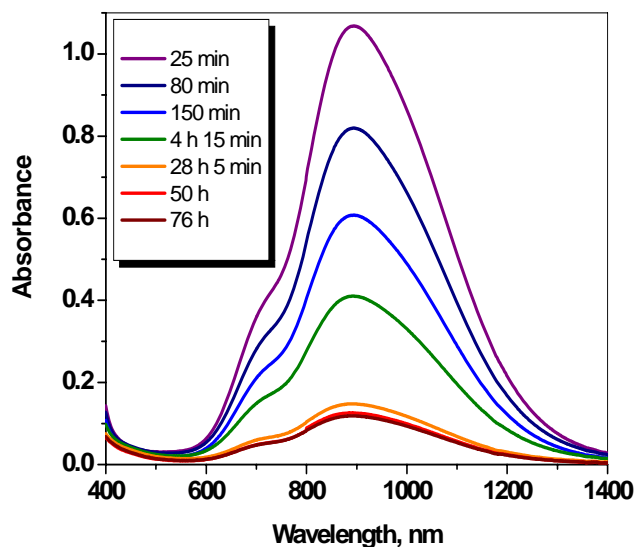

**Figure S7.** Evolution of the electronic spectra of  $\text{Cu}(\text{OTf})_2/\text{Me}_6\text{TREN}$  in the presence of Cu metal in DMSO. Conditions:  $[\text{Cu}(\text{OTf})_2]_0 = 2.5 \text{ mM}$ ,  $[\text{Cu}^0]_0 = 2.75 \text{ mM}$ ,  $[\text{Me}_6\text{TREN}]_0 = 5.25 \text{ mM}$ ,  $25^\circ\text{C}$ .

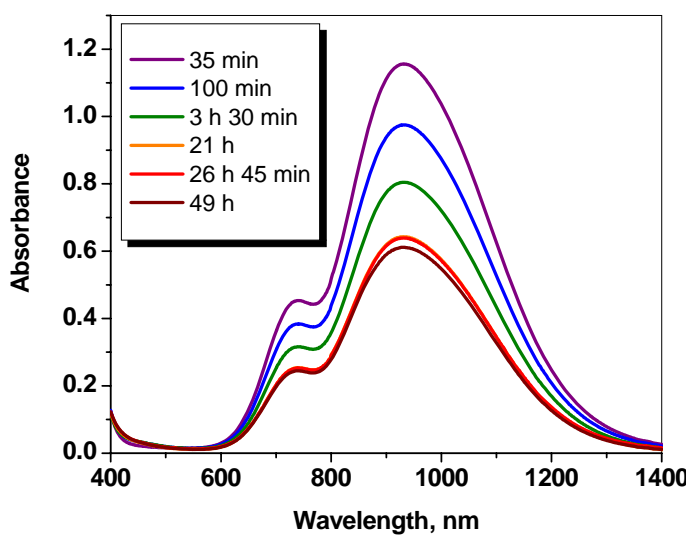

**Figure S8.** Evolution of the electronic spectra of  $\text{CuCl}_2/\text{Me}_6\text{TREN}$  in the presence of Cu metal in DMSO. Conditions:  $[\text{CuCl}_2]_0 = 2.5 \text{ mM}$ ,  $[\text{Cu}^0]_0 = 2.75 \text{ mM}$ ,  $[\text{Me}_6\text{TREN}]_0 = 5.25 \text{ mM}$ ,  $25^\circ\text{C}$ .

#### D. Disproportionation of $\text{CuBr}$ / $\text{Me}_6\text{TREN}$ in DMF

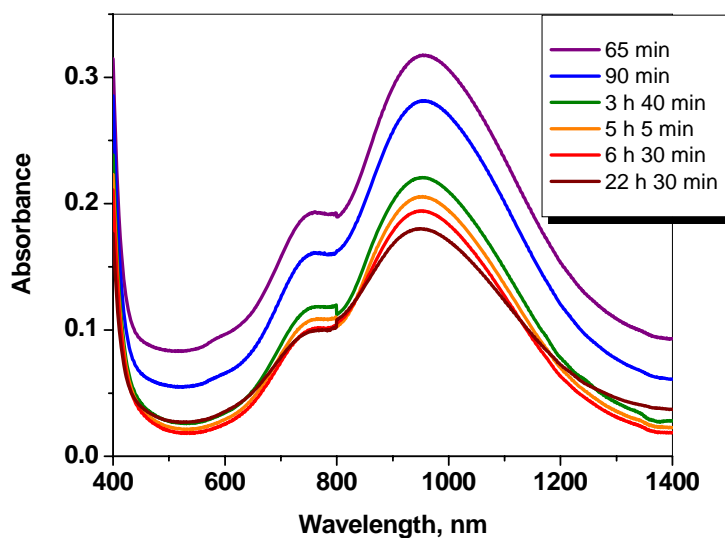

**Figure S9.** Evolution of electronic spectra during the disproportionation of  $\text{CuBr}/\text{Me}_6\text{TREN}$  in DMF. Conditions:  $[\text{CuBr}]_0 = 5 \text{ mM}$ ,  $[\text{Me}_6\text{TREN}]_0 = 5 \text{ mM}$ ,  $25^\circ\text{C}$ .

## II. Polymerization Results

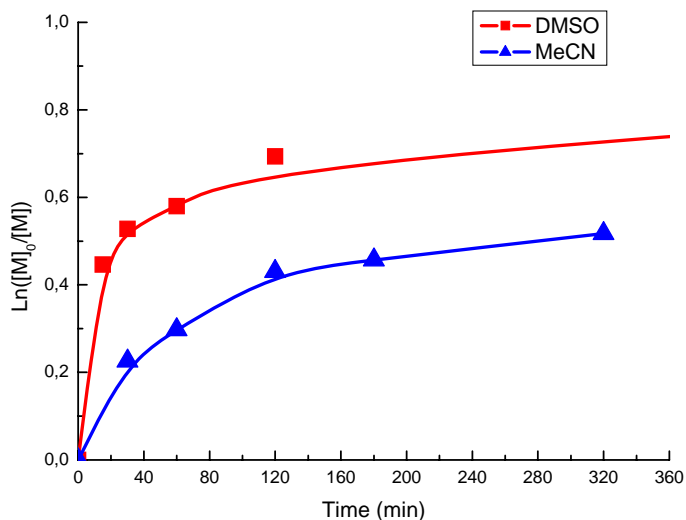

**Figure S10.** Kinetic plot for MA polymerization with CuBr/Me<sub>6</sub>TREN:

[MA]/[MBP]/[CuBr]/[Me<sub>6</sub>TREN] = 222/1/1/1; 25°C, MA/DMSO or MeCN = 1/1 v/v.

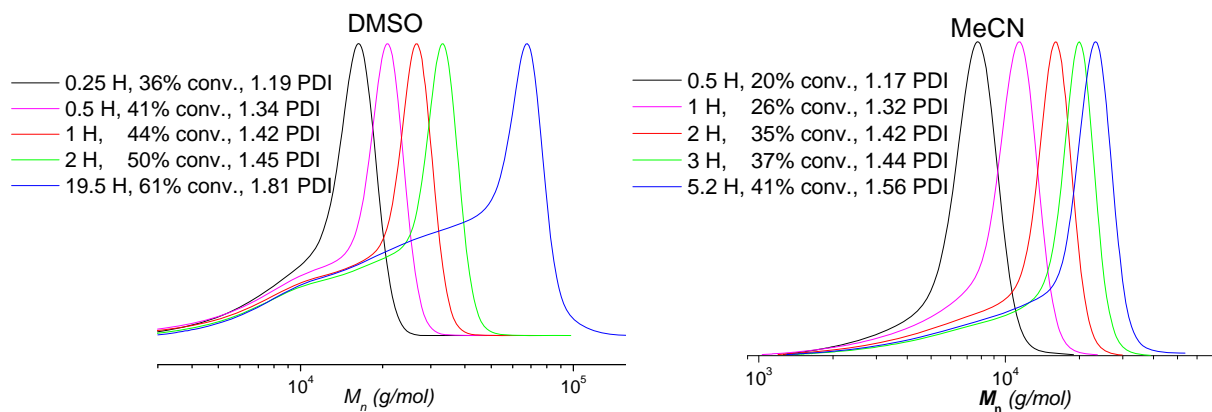

**Figure S11.** GPC traces illustrating molecular weight evolution during MA polymerization with

CuBr/Me<sub>6</sub>TREN: [MA]/[MBP]/[CuBr]/[Me<sub>6</sub>TREN] = 222/1/1/1 ; 25°C, MA/DMSO or MeCN = 1/1

v/v.

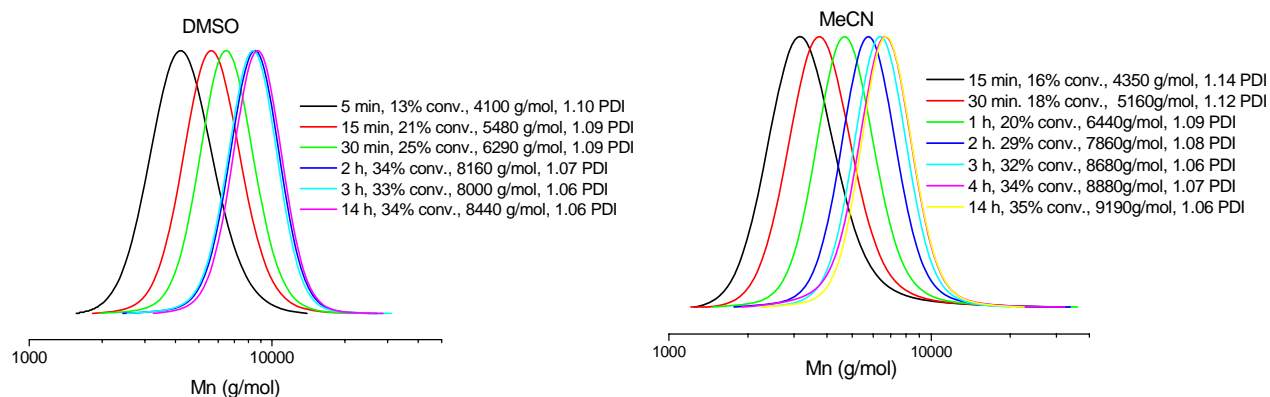

**Figure S12.** GPC traces illustrating molecular weight evolution during MA polymerization with CuBr/Me<sub>6</sub>TREN: [MA]/[MBP]/[CuBr]/[Me<sub>6</sub>TREN] = 222/1/0.1/0.1 ; 25°C, MA/DMSO or MeCN = 1/1 v/v.

### III. “Ultra-high” molar mass PMA using stock suspensions

**Experimental.** 8 parallel reactions were carried out at room temperature in a 12 position parallel synthesizer (Carousel Reaction Station). In a typical experiment, seven 1 mL aliquots of an 8 mL suspension of Me<sub>6</sub>TREN (17 µL, 0.064mmol) and Cu<sup>0</sup> (4.1 mg, 0.064mmol) in DMSO or MeCN were injected into seven different reactors, while the eighth (remaining) aliquot was left in the original reactor. Nitrogen purged MA (8 mL, 89 mmol) and DMSO or MeCN (7 mL) were added to the tubes. Finally 0.1 mL of MBP (0.008 mmol) was taken from a stock solution (18 µL (0.16 mmol) in 2 mL solvent) and added to the polymerization mixture.

Targeting ultra-high molecular weight PMA can be challenging on a laboratory scale when microgram quantities of reagents must be accurately dispensed. Stock solutions are typically employed under such conditions, but given the heterogeneous nature of a Cu<sup>0</sup> stock suspension, flawless reproducibility of polymerizations targeting ultra-high molecular weights cannot be

achieved on a relatively small scale. To minimize any error, seven aliquots of a  $\text{Cu}^0/\text{Me}_6\text{TREN}$  suspension in either DMSO or MeCN were injected into seven different reactors, and the eighth (remaining) aliquot was left in the original reactor. After monomer was added to each reactor, initiator was injected. Parallel reactions were all run for the same length of time. Results of these polymerizations are summarized in Figure S13.

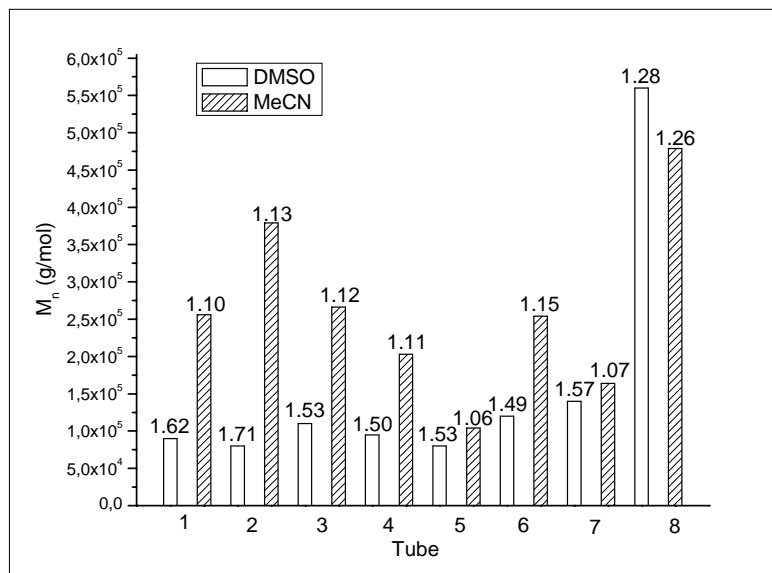

**Figure S13.** Final  $M_n$  and PDI of PMA with ultra-high molar mass targeted in several parallel reactors using the same stock solution.  $[\text{MA}]/[\text{MBP}]/[\text{Cu}^0]/[\text{Me}_6\text{TREN}]/[\text{CuBr}_2] = 11,100/1/1/1.1/0.1$ ;  $25^\circ\text{C}$ ;  $\text{MA}/\text{DMSO}$  or  $\text{MeCN} = 1/1$  v/v. Catalyst was taken from the stock solution (tube 8) and distributed into 7 reaction tubes starting from tube 1 to 7. Reaction time: 23 h for tubes 1-7 in DMSO, 8 h for tube 8; 7.5 h for tubes 1-8 in MeCN.

The molecular weights attained ranged between  $M_n = 60,000$  and  $600,000$  g/mol, and the polymerization rate (as deduced from molar masses) also varied by an order of magnitude, illustrating the difficulty in handling these heterogeneous systems at low catalyst concentrations.



#### IV. Model Studies: Reaction of MBP with Cu<sup>0</sup>/Me<sub>6</sub>TREN in the absence of a nitroxide radical trap

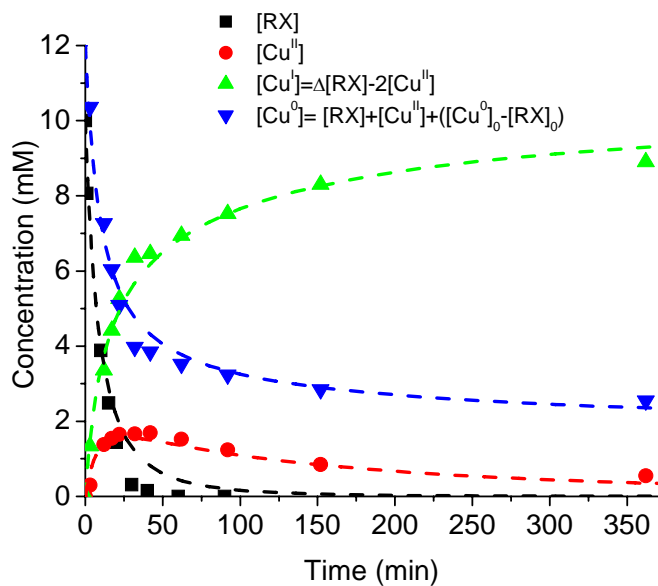

**Figure S14.** Time dependent concentration of Cu species and PhCH<sub>2</sub>Cl in MeCN as determined by gas chromatography and spectrophotometric measurements. [Cu<sup>0</sup>]/[Me<sub>6</sub>TREN]/[PhCH<sub>2</sub>Cl]/[trichlorobenzene] = 12/10/10/10 mM.
